# Supplementary material for: The secondary structure of apolipoprotein A-I on 9.6-nm reconstituted high-density lipoprotein determined by EPR spectroscopy
Source: PubMed Central journal article supplement (PMC3906832; doi:10.1111/febs.12334), 2013-06-10
Supplement: febs0280-3416-sd1.pdf [file febs0280-3416-sd1.pdf]

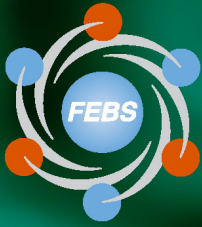

WILEY  
Blackwell

the **FEBS**  
Journal

[www.febsjournal.org](http://www.febsjournal.org)

# **The secondary structure of apolipoprotein A-I on 9.6-nm reconstituted high-density lipoprotein determined by EPR spectroscopy**

Michael N. Oda, Madhu S. Budamagunta, Mark S. Borja, Jitka Petrlova, John C. Voss and Jens O. Lagerstedt

DOI: 10.1111/febs.12334

Supplementary figure 1 - Oda et al.

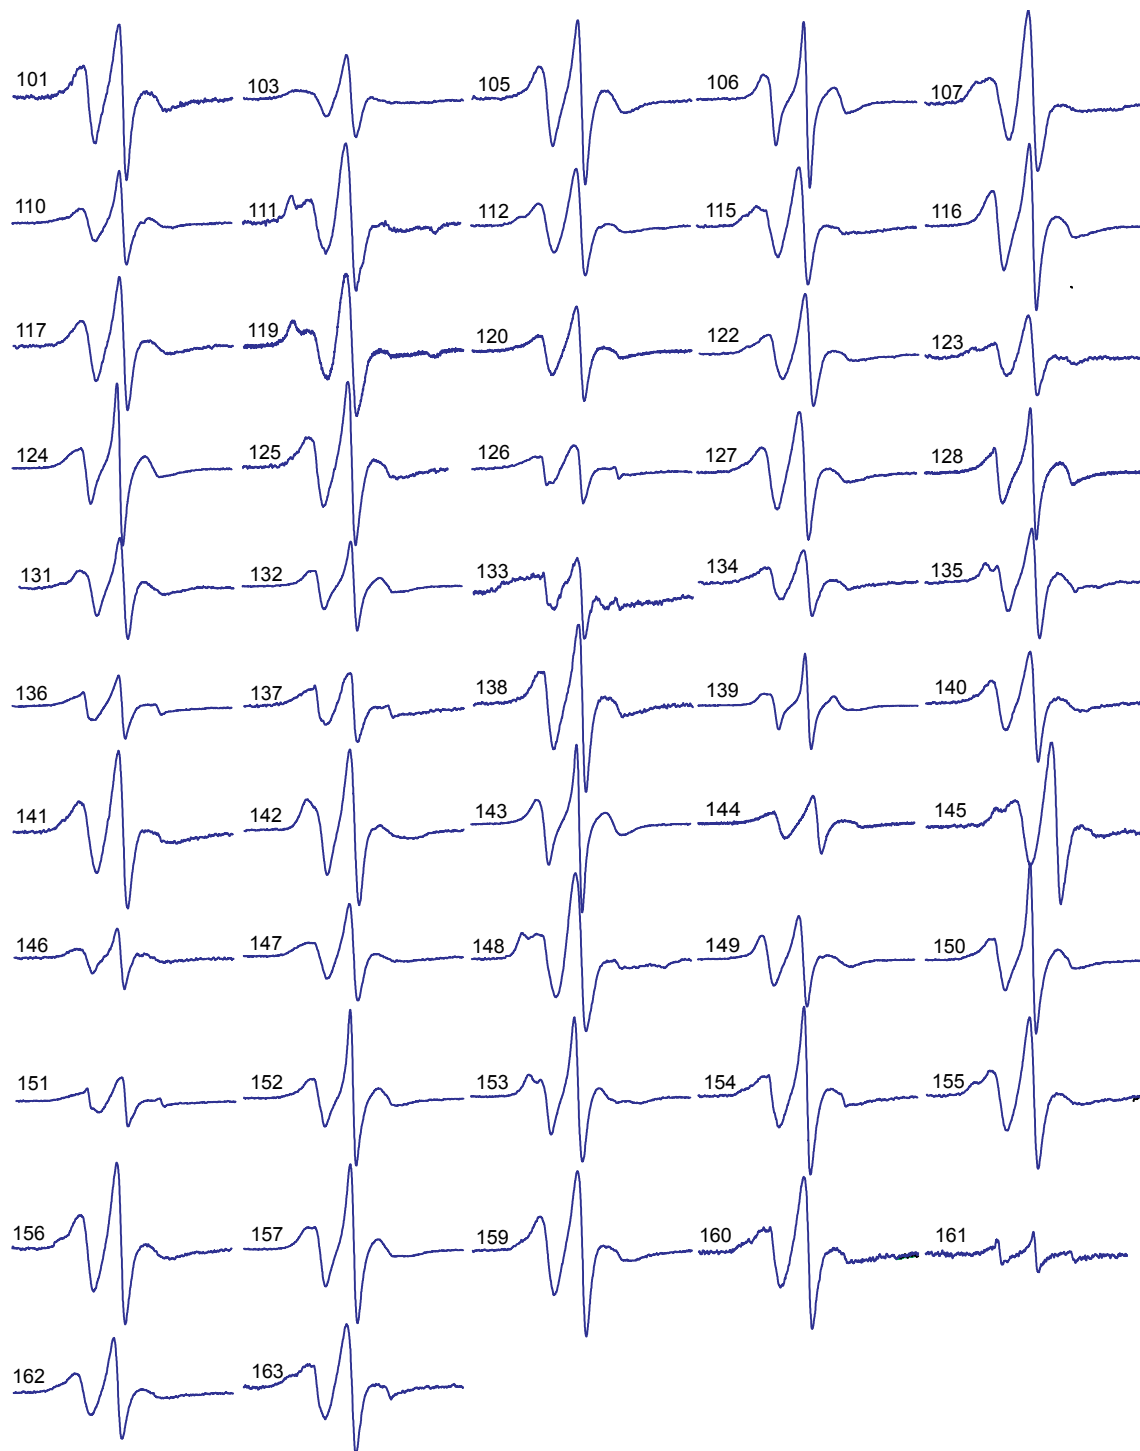

Fig S1. Examples of EPR spectra of spin-labeled apoA-I proteins within the 99-163 region of the primary sequence.
